# Supplementary material
Source: PubMed Central journal article supplement (PMC5862315)
Supplement: bgx001_suppl_supplementary_material_2.pdf [file bgx001_suppl_supplementary_material_2.pdf]

**Supplemental 2. Transcripts associated with canonical signaling in colon of mice on HFD and tumors (RD and HFD)**

© 2000-2016 QIAGEN. All rights reserved.

**Genes in the Actin Cytoskeleton Signaling network**

|          | <b>HFD</b>   | <b>RD Tumor</b> | <b>HFD Tumor</b> |
|----------|--------------|-----------------|------------------|
| MYH1     | 4307.538411  | 35805.16377     | 15250.79832      |
| MYL3     | 1564.642448  | 7166.376877     | 5937.24138       |
| MYH8     | 839.0208581  | 5621.819868     | 2426.259307      |
| MYL1     | 439.3939759  | 2159.017074     | 1701.994843      |
| TTN      | 377.373933   | 1768.872127     | 1125.822355      |
| MYLPF    | 356.2001865  | 2006.435997     | 1662.390202      |
| MYLK2    | 295.6486744  | 1541.244553     | 1074.337374      |
| ACTA1    | 163.6772361  | 1379.557427     | 816.8961497      |
| Actn3    | 133.0064413  | 1457.571655     | 580.4597267      |
| ACTN2    | 89.13320914  | 380.3201212     | 367.8456673      |
| MYH2     | 56.23976388  | 201.4468163     | 134.4402355      |
| ACTC1    | 35.65482721  | 63.68744174     | 64.07355905      |
| LBP      | 2.941660319  | N/A             | N/A              |
| VAV2     | 2.278585974  | 2.168885734     | 2.496748417      |
| MSN      | 2.087470899  | 1.733930628     | N/A              |
| PDGFC    | 2.05022064   | N/A             | N/A              |
| MYH10    | 1.932362693  | N/A             | N/A              |
| WAVE1    | 1.914150744  | N/A             | N/A              |
| ARHGAP24 | 1.767017579  | N/A             | N/A              |
| MRAS     | 1.67414794   | 1.551592946     | N/A              |
| MYL4     | 1.606805633  | N/A             | N/A              |
| PIP4K2B  | 1.56280759   | 2.66768712      | N/A              |
| GSN      | 1.541649     | N/A             | N/A              |
| MYL12A   | -1.560496049 | -1.642814646    | N/A              |
| MAP2K2   | -1.657151109 | N/A             | N/A              |
| IQGAP2   | -1.828621998 | -1.750373949    | N/A              |
| MYH14    | -2.102744413 | -2.025393502    | N/A              |

**Genes in the Acute Phase Response Signaling network**

|          | <b>HFD</b>   | <b>RD Tumor</b> | <b>HFD Tumor</b> |
|----------|--------------|-----------------|------------------|
| CRABP2   | 18.68076993  | 59.71396224     | 76.3452183       |
| KLKB1    | 5.620550986  | N/A             | N/A              |
| C3       | 3.698927077  | N/A             | N/A              |
| SERPINF1 | 3.445991114  | N/A             | N/A              |
| MAPK12   | 3.150189309  | N/A             | N/A              |
| LBP      | 2.941660319  | N/A             | N/A              |
| OSMR     | 2.812428732  | 3.962606622     | N/A              |
| SERPINA1 | 2.786995029  | N/A             | N/A              |
| CP       | 2.717530627  | 8.554949545     | 4.744353959      |
| RBP1     | 2.463345076  | 7.005940516     | 5.442109606      |
| MAPK11   | 2.160939274  | 2.730003606     | 2.68284995       |
| SERPING1 | 1.927781446  | N/A             | N/A              |
| C1R      | 1.884030064  | N/A             | N/A              |
| IL6ST    | 1.815126204  | N/A             | N/A              |
| C1S      | 1.762957126  | N/A             | 1.382969688      |
| AKT3     | 1.725946331  | N/A             | N/A              |
| MRAS     | 1.67414794   | 1.551592946     | N/A              |
| C2       | 1.559739025  | N/A             | N/A              |
| HMOX1    | 1.50676748   | 4.963712358     | 13.44581032      |
| TRADD    | -1.595669048 | -2.069297469    | N/A              |
| MAP2K2   | -1.657151109 | N/A             | N/A              |
| HNF1A    | -1.815941748 | N/A             | -2.484007063     |
| IL18     | -1.896161675 | -2.68301863     | -2.712724323     |
| RBP2     | -4.776555038 | -4.615634752    | -4.090090097     |

**Genes in the Aryl Hydrocarbon Receptor Signaling network**

|         | <b>HFD</b>   | <b>RD Tumor</b> | <b>HFD Tumor</b> |
|---------|--------------|-----------------|------------------|
| HSPB3   | 52.56124714  | 180.3767026     | 188.7976066      |
| GSTA5   | 9.068535486  | 11.70503204     | 12.13031267      |
| RXRG    | 6.325906996  | 26.28815742     | 14.03753433      |
| NR2F1   | 3.174330914  | N/A             | N/A              |
| TGFB3   | 2.756157873  | N/A             | N/A              |
| HSPB2   | 2.456454696  | N/A             | N/A              |
| ALDH1A3 | 2.306523511  | 24.20355967     | N/A              |
| ALDH1A2 | 1.960732067  | N/A             | N/A              |
| RARG    | 1.927530874  | 3.583506903     | 2.604100271      |
| TGM2    | 1.632055641  | 1.503931904     | N/A              |
| ALDH1L1 | -1.872209434 | N/A             | N/A              |

|         |              |              |              |
|---------|--------------|--------------|--------------|
| MGST2   | -1.962013234 | -2.716037883 | -2.168475056 |
| ALDH1B1 | -2.100438067 | -2.698765511 | N/A          |
| MGST3   | -2.247561695 | -2.172887585 | -1.902538081 |
| MGST1   | -2.435155427 | -1.747449084 | N/A          |

**Genes in the Corticotropin Releasing Hormone Signaling network**

|         | <b>HFD</b>   | <b>RD Tumor</b> | <b>HFD Tumor</b> |
|---------|--------------|-----------------|------------------|
| KRT1    | 155.6578958  | 137.4871982     | 217.0247012      |
| CALML5  | 54.34243274  | 58.85076453     | 133.6584883      |
| CRHR2   | 17.46626493  | 69.50992722     | 56.3698328       |
| MAPK12  | 3.150189309  | N/A             | N/A              |
| NOS3    | 2.629812043  | 2.912581135     | N/A              |
| GUCY1A3 | 2.44601147   | N/A             | N/A              |
| MAPK11  | 2.160939274  | 2.730003606     | 2.68284995       |
| GUCY1B3 | 2.002590601  | N/A             | N/A              |
| ADCY1   | 2.002309478  | 5.0897452       | 2.46463109       |
| PRKD1   | 1.955317237  | 3.537227403     | 3.387659723      |
| GLI3    | 1.822279519  | N/A             | N/A              |
| GNAI1   | 1.778362153  | N/A             | N/A              |
| PRKAR2B | 1.760011412  | N/A             | N/A              |
| NOS1    | 1.726275798  | N/A             | N/A              |
| Gli2    | 1.724655373  | N/A             | N/A              |
| Gao     | 1.714072025  | N/A             | N/A              |
| NPR2    | 1.632115691  | N/A             | N/A              |
| PRKD3   | 1.616898714  | N/A             | N/A              |
| ADCY3   | 1.530737594  | N/A             | N/A              |
| MAP2K2  | -1.657151109 | N/A             | N/A              |
| GUCY2C  | -1.930999676 | N/A             | N/A              |

**Genes in the Fcy Receptor-mediated Phagocytosis in Macrophages and Mo**

|       | <b>HFD</b>   | <b>RD Tumor</b> | <b>HFD Tumor</b> |
|-------|--------------|-----------------|------------------|
| ACTA1 | 163.6772361  | 1379.557427     | 816.8961497      |
| ACTC1 | 35.65482721  | 63.68744174     | 64.07355905      |
| VAV2  | 2.278585974  | 2.168885734     | 2.496748417      |
| MYO5A | 2.193359812  | 1.698944055     | N/A              |
| PLD2  | 1.994880038  | 3.564539687     | 2.612046356      |
| PRKD1 | 1.955317237  | 3.537227403     | 3.387659723      |
| AKT3  | 1.725946331  | N/A             | N/A              |
| FYN   | 1.660659733  | N/A             | 1.555167112      |
| PRKD3 | 1.616898714  | N/A             | N/A              |
| HMOX1 | 1.50676748   | 4.963712358     | 13.44581032      |
| PAK1  | -1.246108261 | N/A             | N/A              |

**Genes in the Glioblastoma Multiforme Signaling network**

|        | <b>HFD</b>   | <b>RD Tumor</b> | <b>HFD Tumor</b> |
|--------|--------------|-----------------|------------------|
| WNT10A | 41.50427945  | 351.1066652     | 278.002158       |
| WNT7B  | 9.583331046  | 80.7389937      | 25.91158235      |
| WNT10B | 8.417768696  | N/A             | 6.668472985      |
| WNT9A  | 2.690120314  | N/A             | N/A              |
| PDGFRA | 2.193813668  | N/A             | N/A              |
| IGF1   | 2.139962224  | N/A             | N/A              |
| PDGFC  | 2.05022064   | N/A             | N/A              |
| IGF2   | 2.006812595  | N/A             | N/A              |
| RHOJ   | 1.866305158  | N/A             | N/A              |
| FZD7   | 1.842494732  | N/A             | N/A              |
| AKT3   | 1.725946331  | N/A             | N/A              |
| FZD2   | 1.722176026  | N/A             | N/A              |
| MRAS   | 1.67414794   | 1.551592946     | N/A              |
| RND2   | 1.552933784  | N/A             | N/A              |
| MAP2K2 | -1.657151109 | N/A             | N/A              |

**Genes in the HMGB1 Signaling network**

|        | <b>HFD</b>   | <b>RD Tumor</b> | <b>HFD Tumor</b> |
|--------|--------------|-----------------|------------------|
| PLAT   | 3.209037358  | 14.58254543     | 10.47598852      |
| MAPK12 | 3.150189309  | N/A             | N/A              |
| TGFB3  | 2.756157873  | N/A             | N/A              |
| IL12A  | 2.300259124  | N/A             | N/A              |
| VCAM1  | 2.237241351  | N/A             | N/A              |
| MAPK11 | 2.160939274  | 2.730003606     | 2.68284995       |
| RHOJ   | 1.866305158  | N/A             | N/A              |
| AKT3   | 1.725946331  | N/A             | N/A              |
| MRAS   | 1.67414794   | 1.551592946     | N/A              |
| RND2   | 1.552933784  | N/A             | N/A              |
| MAP2K2 | -1.657151109 | N/A             | N/A              |

|                                            |              |                 |                  |
|--------------------------------------------|--------------|-----------------|------------------|
| IL18                                       | -1.896161675 | -2.68301863     | -2.712724323     |
| <b>Genes in the IL-6 Signaling network</b> | <b>HFD</b>   | <b>RD Tumor</b> | <b>HFD Tumor</b> |
| HSPB3                                      | 52.56124714  | 180.3767026     | 188.7976066      |
| MAPK12                                     | 3.150189309  | N/A             | N/A              |
| LBP                                        | 2.941660319  | N/A             | N/A              |
| HSPB2                                      | 2.456454696  | N/A             | N/A              |
| MAPK11                                     | 2.160939274  | 2.730003606     | 2.68284995       |
| IL18RAP                                    | 2.048912266  | N/A             | 3.065537038      |
| IL6ST                                      | 1.815126204  | N/A             | N/A              |
| COL1A1                                     | 1.790350757  | 2.875711265     | 3.246687324      |
| AKT3                                       | 1.725946331  | N/A             | N/A              |
| MRAS                                       | 1.67414794   | 1.551592946     | N/A              |
| MAP4K4                                     | 1.52346231   | 2.331541084     | 2.008185627      |
| MAP2K2                                     | -1.657151109 | N/A             | N/A              |
| IL18                                       | -1.896161675 | -2.68301863     | -2.712724323     |
| MDR1                                       | -4.503771745 | -4.777898666    | -7.053652822     |
| <b>Genes in the IL-8 Signaling network</b> | <b>HFD</b>   | <b>RD Tumor</b> | <b>HFD Tumor</b> |
| MMP9                                       | 3.686161946  | 15.74620289     | N/A              |
| MAPK12                                     | 3.150189309  | N/A             | N/A              |
| TEK                                        | 2.970415616  | 1.791390164     | 2.845568196      |
| FLT4                                       | 2.585086536  | N/A             | 2.511563228      |
| FIGF                                       | 2.28561325   | N/A             | N/A              |
| VCAM-1                                     | 2.237241351  | N/A             | N/A              |
| PDGFC                                      | 2.05022064   | N/A             | N/A              |
| IRAK3                                      | 2.00529712   | N/A             | N/A              |
| PLD2                                       | 1.994880038  | 3.564539687     | 2.612046356      |
| ANGPT1                                     | 1.959195281  | N/A             | N/A              |
| FLT1                                       | 1.957766528  | 2.664241614     | N/A              |
| PRKD1                                      | 1.955317237  | 3.537227403     | 3.387659723      |
| KDR                                        | 1.946646509  | 2.592358028     | 2.772586664      |
| RHOJ                                       | 1.866305158  | N/A             | N/A              |
| GNAI1                                      | 1.778362153  | N/A             | N/A              |
| GNG11                                      | 1.771306009  | N/A             | N/A              |
| AKT3                                       | 1.725946331  | N/A             | N/A              |
| ANGPT2                                     | 1.683814696  | 3.877610015     | 3.315038757      |
| MRAS                                       | 1.67414794   | 1.551592946     | N/A              |
| PRKD3                                      | 1.616898714  | N/A             | N/A              |
| RND2                                       | 1.552933784  | N/A             | N/A              |
| NIK                                        | 1.52346231   | 2.331541084     | 2.008185627      |
| HMOX1                                      | 1.50676748   | 4.963712358     | 13.44581032      |
| LASP-1                                     | -1.504037232 | -1.343419199    | N/A              |
| MAP2K2                                     | -1.657151109 | N/A             | N/A              |
| <b>Genes in the ILK Signaling network</b>  | <b>HFD</b>   | <b>RD Tumor</b> | <b>HFD Tumor</b> |
| MYH1                                       | 4307.538411  | 35805.16377     | 15250.79832      |
| MYL3                                       | 1564.642448  | 7166.376877     | 5937.24138       |
| MYH8                                       | 839.0208581  | 5621.819868     | 2426.259307      |
| MYL1                                       | 439.3939759  | 2159.017074     | 1701.994843      |
| ACTA1                                      | 163.6772361  | 1379.557427     | 816.8961497      |
| Actn3                                      | 133.0064413  | 1457.571655     | 580.4597267      |
| ACTN2                                      | 89.13320914  | 380.3201212     | 367.8456673      |
| MYH2                                       | 56.23976388  | 201.4468163     | 134.4402355      |
| ACTC1                                      | 35.65482721  | 63.68744174     | 64.07355905      |
| MMP9                                       | 3.686161946  | 15.74620289     | N/A              |
| MAPK12                                     | 3.150189309  | N/A             | N/A              |
| ITGB8                                      | 2.879022915  | 3.003534719     | 3.323557182      |
| VIM                                        | 2.337691034  | N/A             | N/A              |
| FIGF                                       | 2.28561325   | N/A             | N/A              |
| HIF1A                                      | 2.244422562  | N/A             | N/A              |
| PDGFC                                      | 2.05022064   | N/A             | N/A              |
| MYH10                                      | 1.932362693  | N/A             | N/A              |
| RHOJ                                       | 1.866305158  | N/A             | N/A              |
| PPP2R2C                                    | 1.847366778  | N/A             | N/A              |
| AKT3                                       | 1.725946331  | N/A             | N/A              |
| MYL4                                       | 1.606805633  | N/A             | N/A              |
| ILK                                        | 1.585459639  | N/A             | N/A              |
| RND2                                       | 1.552933784  | N/A             | N/A              |
| PARVA                                      | 1.517740935  | N/A             | N/A              |

|                                                                      |              |              |              |
|----------------------------------------------------------------------|--------------|--------------|--------------|
| DSP                                                                  | -1.420559217 | N/A          | N/A          |
| MYH14                                                                | -2.102744413 | -2.025393502 | N/A          |
| <b>Genes in the Intrinsic Prothrombin Activation Pathway network</b> |              |              |              |
| KLKB1                                                                | 5.620550986  | N/A          | N/A          |
| THBD                                                                 | 2.103092984  | N/A          | 2.592414492  |
| FXIIIa                                                               | 1.978051549  | N/A          | N/A          |
| COL1A2                                                               | 1.962741934  | N/A          | 2.011004118  |
| COL1A1                                                               | 1.790350757  | 2.875711265  | 3.246687324  |
| COL5A3                                                               | 1.542141501  | 1.834766449  | N/A          |
| COL3A1                                                               | 1.51550946   | N/A          | 2.052609231  |
| <b>Genes in the Leukocyte Extravasation Signaling network</b>        |              |              |              |
| ACTA1                                                                | 163.6772361  | 1379.557427  | 816.8961497  |
| Actn3                                                                | 133.0064413  | 1457.571655  | 580.4597267  |
| ACTN2                                                                | 89.13320914  | 380.3201212  | 367.8456673  |
| ACTC1                                                                | 35.65482721  | 63.68744174  | 64.07355905  |
| MMP9                                                                 | 3.686161946  | 15.74620289  | N/A          |
| BMX                                                                  | 3.407872487  | N/A          | N/A          |
| CLDN11                                                               | 3.271603105  | N/A          | N/A          |
| CLDN5                                                                | 3.207753096  | 1.947510993  | N/A          |
| MAPK12                                                               | 3.150189309  | N/A          | N/A          |
| ITK                                                                  | 2.923567788  | N/A          | N/A          |
| MMP16                                                                | 2.879271803  | N/A          | N/A          |
| RASGRP1                                                              | 2.656645802  | N/A          | N/A          |
| SPN                                                                  | 2.603489237  | N/A          | 2.940948253  |
| VAV2                                                                 | 2.278585974  | 2.168885734  | 2.496748417  |
| VCAM1                                                                | 2.237241351  | N/A          | N/A          |
| MAPK11                                                               | 2.160939274  | 2.730003606  | 2.68284995   |
| CDH5                                                                 | 2.124471964  | 3.593352155  | N/A          |
| JAM2                                                                 | 2.099938248  | N/A          | N/A          |
| MSN                                                                  | 2.087470899  | 1.733930628  | N/A          |
| RASSF5                                                               | 2.046998731  | 2.660938247  | N/A          |
| ARHGAP6                                                              | 2.036627299  | N/A          | N/A          |
| TIMP3                                                                | 2.012473896  | N/A          | N/A          |
| PRKD1                                                                | 1.955317237  | 3.537227403  | 3.387659723  |
| MMP28                                                                | 1.903595253  | 5.729000931  | N/A          |
| CXCL12                                                               | 1.873782365  | N/A          | N/A          |
| PECAM1                                                               | 1.851336064  | 2.266062171  | N/A          |
| MMP19                                                                | 1.834898852  | N/A          | N/A          |
| TIMP4                                                                | 1.827897856  | N/A          | N/A          |
| GNAI1                                                                | 1.778362153  | N/A          | N/A          |
| TIMP2                                                                | 1.762576446  | N/A          | N/A          |
| DLC1                                                                 | 1.723214713  | N/A          | N/A          |
| THY1                                                                 | 1.662458434  | N/A          | N/A          |
| MMP11                                                                | 1.624545706  | N/A          | 1.724669785  |
| PRKD3                                                                | 1.616898714  | N/A          | N/A          |
| CLDN23                                                               | -1.632217441 | N/A          | N/A          |
| MAP2K2                                                               | -1.657151109 | N/A          | N/A          |
| MMP15                                                                | -1.657544947 | -1.567595223 | N/A          |
| <b>Genes in the NF-<math>\kappa</math>B Signaling network</b>        |              |              |              |
| NTRK3                                                                | 4.874433594  | N/A          | N/A          |
| NTRK2                                                                | 3.321895708  | N/A          | N/A          |
| FLT4                                                                 | 2.585086536  | N/A          | 2.511563228  |
| NGF                                                                  | 2.267318433  | N/A          | N/A          |
| PDGFRA                                                               | 2.193813668  | N/A          | N/A          |
| IRAK-M                                                               | 2.00529712   | N/A          | N/A          |
| FLT1                                                                 | 1.957766528  | 2.664241614  | N/A          |
| KDR                                                                  | 1.946646509  | 2.592358028  | 2.772586664  |
| FGFR1                                                                | 1.829401943  | N/A          | N/A          |
| AKT3                                                                 | 1.725946331  | N/A          | N/A          |
| TGFBR3                                                               | 1.712008298  | N/A          | N/A          |
| MRAS                                                                 | 1.67414794   | 1.551592946  | N/A          |
| LCK                                                                  | 1.591218231  | N/A          | N/A          |
| MAP4K4                                                               | 1.52346231   | 2.331541084  | 2.008185627  |
| TRADD                                                                | -1.595669048 | -2.069297469 | N/A          |
| ABIN-1                                                               | -1.800511496 | -2.413814559 | -2.217899331 |
| IL18                                                                 | -1.896161675 | -2.68301863  | -2.712724323 |

**Genes in the RhoA Signaling network**

|          | <b>HFD</b>   | <b>RD Tumor</b> | <b>HFD Tumor</b> |
|----------|--------------|-----------------|------------------|
| MYL3     | 1564.642448  | 7166.376877     | 5937.24138       |
| MYL1     | 439.3939759  | 2159.017074     | 1701.994843      |
| TTN      | 377.373933   | 1768.872127     | 1125.822355      |
| MYLPF    | 356.2001865  | 2006.435997     | 1662.390202      |
| MYLK2    | 295.6486744  | 1541.244553     | 1074.337374      |
| ACTA1    | 163.6772361  | 1379.557427     | 816.8961497      |
| ACTC1    | 35.65482721  | 63.68744174     | 64.07355905      |
| CDC42EP2 | 2.896488607  | 3.578366277     | 4.866032446      |
| LPAR4    | 2.206134794  | N/A             | N/A              |
| IGF-1    | 2.139962224  | N/A             | N/A              |
| MSN      | 2.087470899  | 1.733930628     | N/A              |
| CDC42EP3 | 2.068271635  | N/A             | N/A              |
| ARHGAP6  | 2.036627299  | N/A             | N/A              |
| WAVE     | 1.914150744  | N/A             | N/A              |
| DLC1     | 1.723214713  | N/A             | N/A              |
| NRP2     | 1.676648408  | N/A             | N/A              |
| MYL4     | 1.606805633  | N/A             | N/A              |
| PIP4K2B  | 1.56280759   | 2.66768712      | N/A              |
| MYL12A   | -1.560496049 | -1.642814646    | N/A              |

**Genes in the Signaling by Rho Family GTPases network**

|          | <b>HFD</b>   | <b>RD Tumor</b> | <b>HFD Tumor</b> |
|----------|--------------|-----------------|------------------|
| MYL3     | 1564.642448  | 7166.376877     | 5937.24138       |
| MYL1     | 439.3939759  | 2159.017074     | 1701.994843      |
| MYLPF    | 356.2001865  | 2006.435997     | 1662.390202      |
| ACTA1    | 163.6772361  | 1379.557427     | 816.8961497      |
| ACTC1    | 35.65482721  | 63.68744174     | 64.07355905      |
| CDH15    | 20.96366567  | 73.45401915     | 37.7572348       |
| MAPK12   | 3.150189309  | N/A             | N/A              |
| GNA15    | 2.99913869   | 7.63033053      | N/A              |
| CDC42EP2 | 2.896488607  | 3.578366277     | 4.866032446      |
| Vimentin | 2.337691034  | N/A             | N/A              |
| CDH13    | 2.308485022  | 3.023714764     | N/A              |
| CDH4     | 2.262962933  | N/A             | N/A              |
| ARHGEF4  | 2.128486935  | 4.640250362     | N/A              |
| CDH5     | 2.124471964  | 3.593352155     | N/A              |
| MSN      | 2.087470899  | 1.733930628     | N/A              |
| CDC42EP3 | 2.068271635  | N/A             | N/A              |
| WAVE     | 1.914150744  | N/A             | N/A              |
| ARHGEF10 | 1.880804505  | N/A             | N/A              |
| RHOJ     | 1.866305158  | N/A             | N/A              |
| ARHGEF15 | 1.860784442  | 1.403319371     | N/A              |
| ARHGEF17 | 1.791957629  | 1.963082251     | N/A              |
| GNAI1    | 1.778362153  | N/A             | N/A              |
| GNG11    | 1.771306009  | N/A             | N/A              |
| CDH11    | 1.744706016  | N/A             | N/A              |
| GNAO1    | 1.714072025  | N/A             | N/A              |
| MRAS     | 1.67414794   | 1.551592946     | N/A              |
| MYL4     | 1.606805633  | N/A             | N/A              |
| PIP4K2B  | 1.56280759   | 2.66768712      | N/A              |
| RND2     | 1.552933784  | N/A             | N/A              |
| MYL12A   | -1.560496049 | -1.642814646    | N/A              |
| CDH17    | -1.600276982 | N/A             | N/A              |
| MAP2K2   | -1.657151109 | N/A             | N/A              |
| GNA11    | -1.869608092 | -2.037477814    | -2.478881882     |
| ARHGEF16 | -1.89776126  | -1.748195852    | -2.074669938     |

**Genes in the VEGF Signaling network**

|       | <b>HFD</b>  | <b>RD Tumor</b> | <b>HFD Tumor</b> |
|-------|-------------|-----------------|------------------|
| ACTA1 | 163.6772361 | 1379.557427     | 816.8961497      |
| Actn3 | 133.0064413 | 1457.571655     | 580.4597267      |
| ACTN2 | 89.13320914 | 380.3201212     | 367.8456673      |
| ACTC1 | 35.65482721 | 63.68744174     | 64.07355905      |
| eNOS  | 2.629812043 | 2.912581135     | N/A              |
| FLT4  | 2.585086536 | N/A             | 2.511563228      |
| FIGF  | 2.28561325  | N/A             | N/A              |
| HIF1A | 2.244422562 | N/A             | N/A              |
| PDGFC | 2.05022064  | N/A             | N/A              |
| FLT1  | 1.957766528 | 2.664241614     | N/A              |
| KDR   | 1.946646509 | 2.592358028     | 2.772586664      |
| AKT3  | 1.725946331 | N/A             | N/A              |

|        |              |             |              |
|--------|--------------|-------------|--------------|
| MRAS   | 1.67414794   | 1.551592946 | N/A          |
| EIF2S2 | -1.602329133 | -1.73288374 | -1.613984584 |
| MAP2K2 | -1.657151109 | N/A         | N/A          |

**Genes in the Role of Wnt/GSK-3 $\beta$  Signaling in the Pathogenesis of Influenz: HFD**

|        | HFD         | RD Tumor    | HFD Tumor   |
|--------|-------------|-------------|-------------|
| WNT10A | 41.50427945 | 351.1066652 | 278.002158  |
| WNT7B  | 9.583331046 | 80.7389937  | 25.91158235 |
| WNT10B | 8.417768696 | N/A         | 6.668472985 |
| WNT9A  | 2.690120314 | N/A         | N/A         |
| FZD7   | 1.842494732 | N/A         | N/A         |
| FZD2   | 1.722176026 | N/A         | N/A         |

**Genes in the Tight Junction Signaling network**

|         | HFD          | RD Tumor     | HFD Tumor    |
|---------|--------------|--------------|--------------|
| MYH1    | 4307.538411  | 35805.16377  | 15250.79832  |
| MYL3    | 1564.642448  | 7166.376877  | 5937.24138   |
| MYH8    | 839.0208581  | 5621.819868  | 2426.259307  |
| MYL1    | 439.3939759  | 2159.017074  | 1701.994843  |
| ACTA1   | 163.6772361  | 1379.557427  | 816.8961497  |
| MYH2    | 56.23976388  | 201.4468163  | 134.4402355  |
| ACTC1   | 35.65482721  | 63.68744174  | 64.07355905  |
| CLDN11  | 3.271603105  | N/A          | N/A          |
| CLDN5   | 3.207753096  | 1.947510993  | N/A          |
| TGFB3   | 2.756157873  | N/A          | N/A          |
| JAM2    | 2.099938248  | N/A          | N/A          |
| MYH10   | 1.932362693  | N/A          | N/A          |
| PVRL1   | 1.851004267  | 6.212327667  | N/A          |
| PPP2R2C | 1.847366778  | N/A          | N/A          |
| PRKAR2B | 1.760011412  | N/A          | N/A          |
| AKT3    | 1.725946331  | N/A          | N/A          |
| MYL4    | 1.606805633  | N/A          | N/A          |
| CGN     | -1.61614912  | -1.87669696  | -2.096446122 |
| CLDN23  | -1.632217441 | N/A          | N/A          |
| IGSF5   | -1.699744616 | N/A          | N/A          |
| MYH14   | -2.102744413 | -2.025393502 | N/A          |

**Genes in the STAT3 Pathway network**

|        | HFD          | RD Tumor    | HFD Tumor   |
|--------|--------------|-------------|-------------|
| NTRK3  | 4.874433594  | N/A         | N/A         |
| NTRK2  | 3.321895708  | N/A         | N/A         |
| MAPK12 | 3.150189309  | N/A         | N/A         |
| FLT4   | 2.585086536  | N/A         | 2.511563228 |
| PDGFRA | 2.193813668  | N/A         | N/A         |
| MAPK11 | 2.160939274  | 2.730003606 | 2.68284995  |
| FLT1   | 1.957766528  | 2.664241614 | N/A         |
| KDR    | 1.946646509  | 2.592358028 | 2.772586664 |
| FGFR1  | 1.829401943  | N/A         | N/A         |
| TGFBR3 | 1.712008298  | N/A         | N/A         |
| MRAS   | 1.67414794   | 1.551592946 | N/A         |
| MAP2K2 | -1.657151109 | N/A         | N/A         |
